# Supplementary material
Source: PubMed Central journal article supplement (PMC3500847)
Supplement: NIHMS408642-supplement-Supporting_Information.pdf [file NIHMS408642-supplement-Supporting_Information.pdf]

**Table of contents**

Figure 1-18. RP HPLC and MALDI-TOF MS characterization of analogs **1-18**.....S2-19

Figure 19. RP HPLC spectra obtained in the serum stability study of **6**.....S20

Figure 20. MALDI-TOF spectra of fractions obtained in the serum stability study of **6** .....S21

Figure 21. RP HPLC spectra obtained in stability study of **6** in EMEM media .....S22

Figure 22. MALDI-TOF spectra of fractions obtained in the stability study of **6** in EMEM.....S23

Figure 23. Stability of **6** in EMEM media.....S23

Table 1. Hemolytic activity .....S24

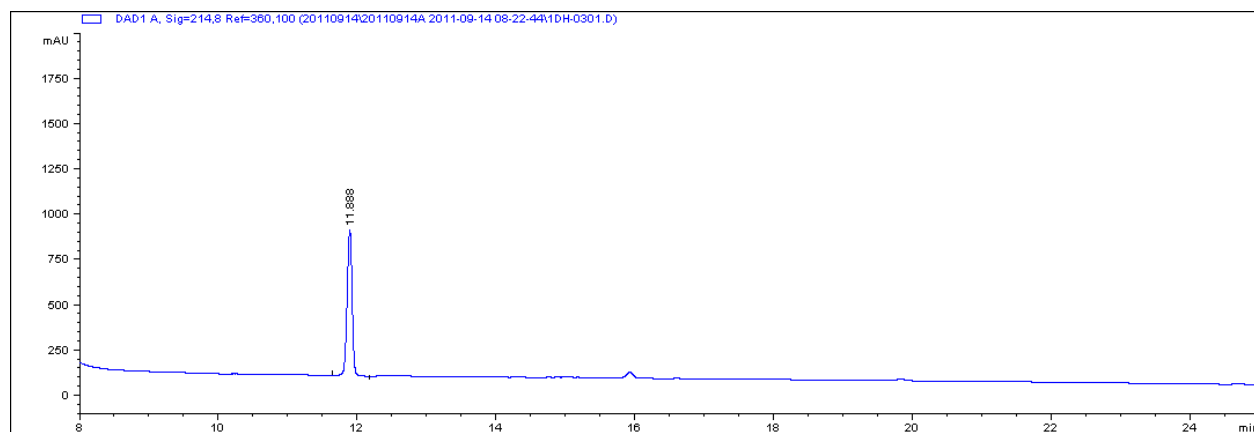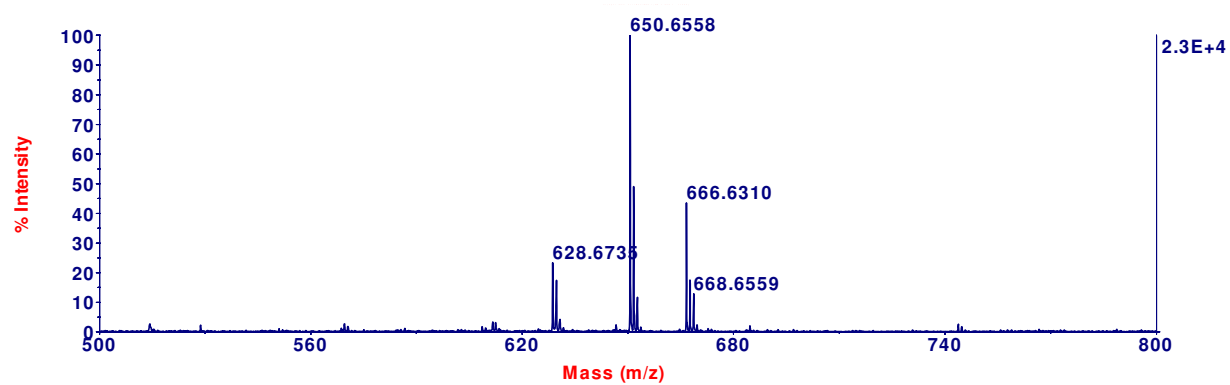

Figure 1. RP HPLC trace (up) and MALDI-TOF spectrum (down) of analog 1.

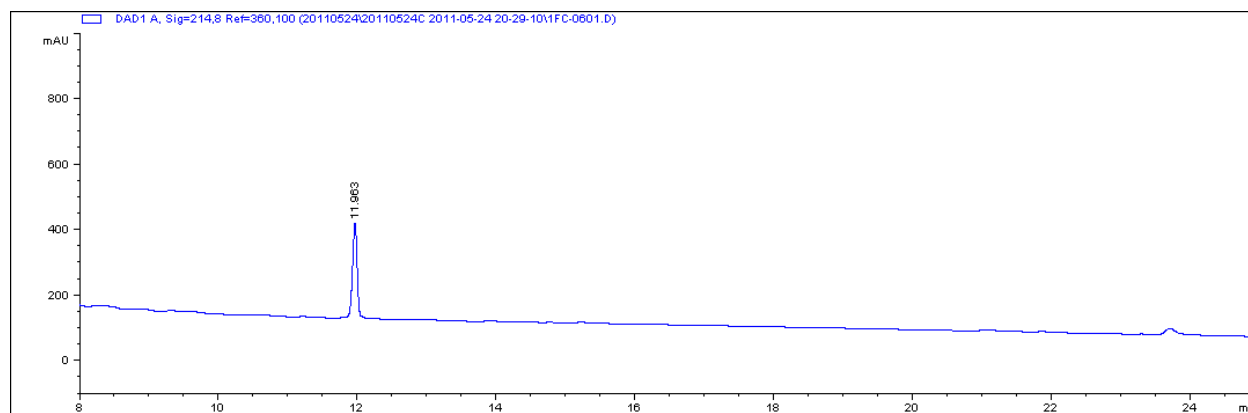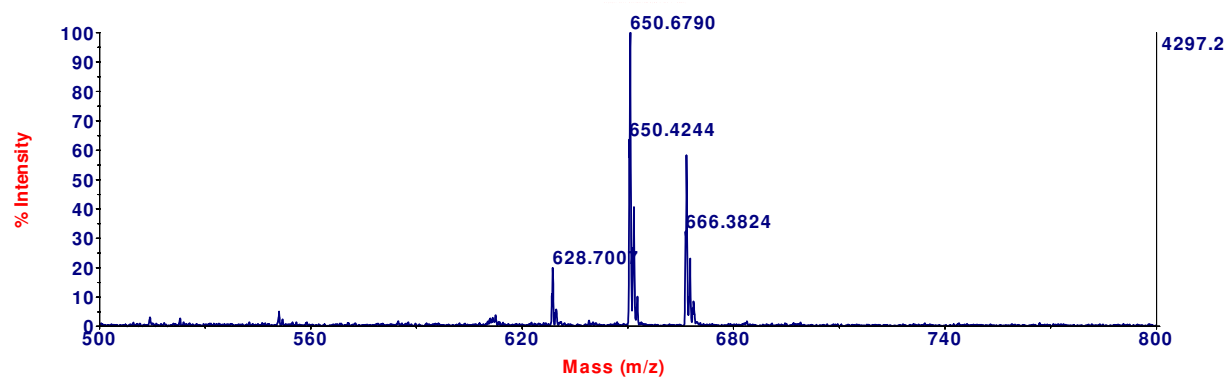

Figure 2. RP HPLC trace (up) and MALDI-TOF spectrum (down) of analog 2.

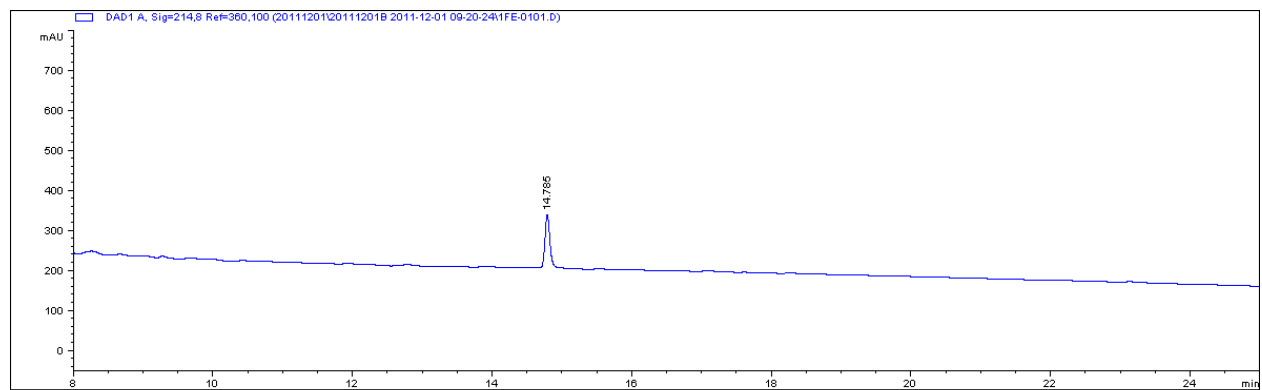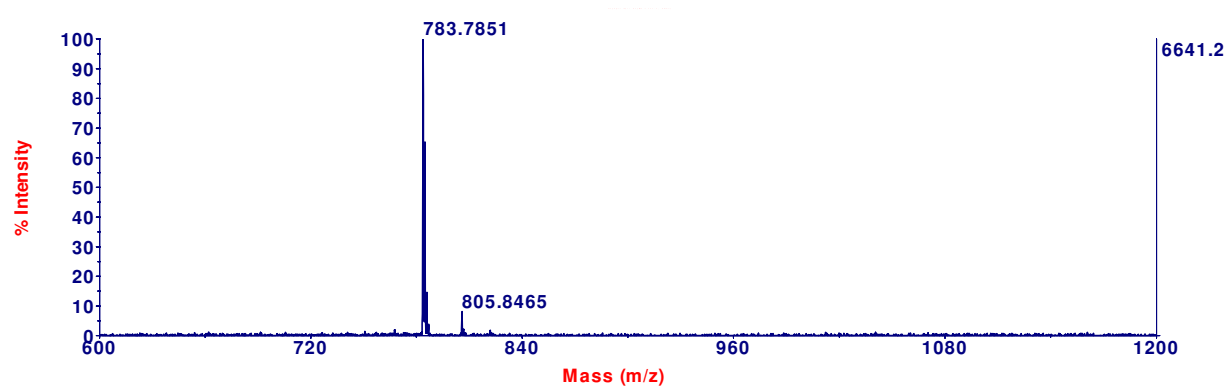

Figure 4. RP HPLC trace (up) and MALDI-TOF spectrum (down) of analog **3**.

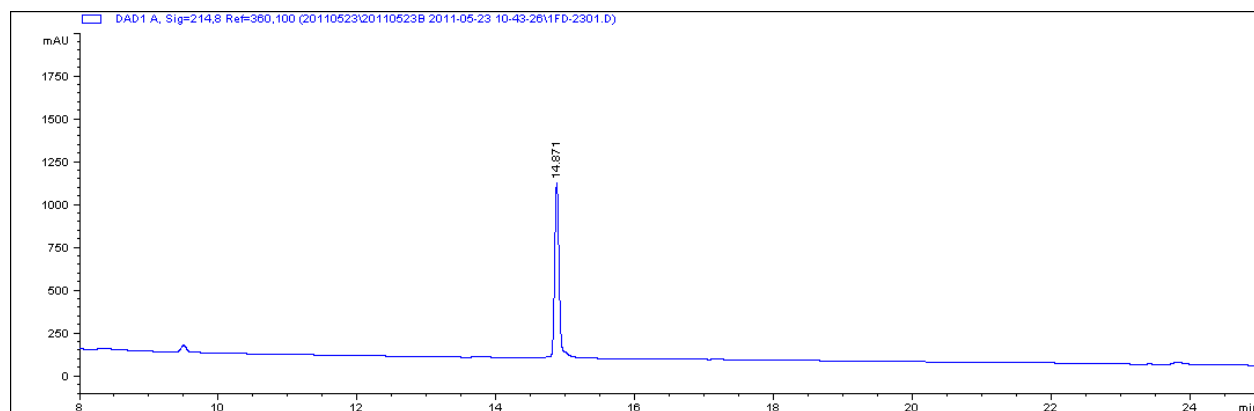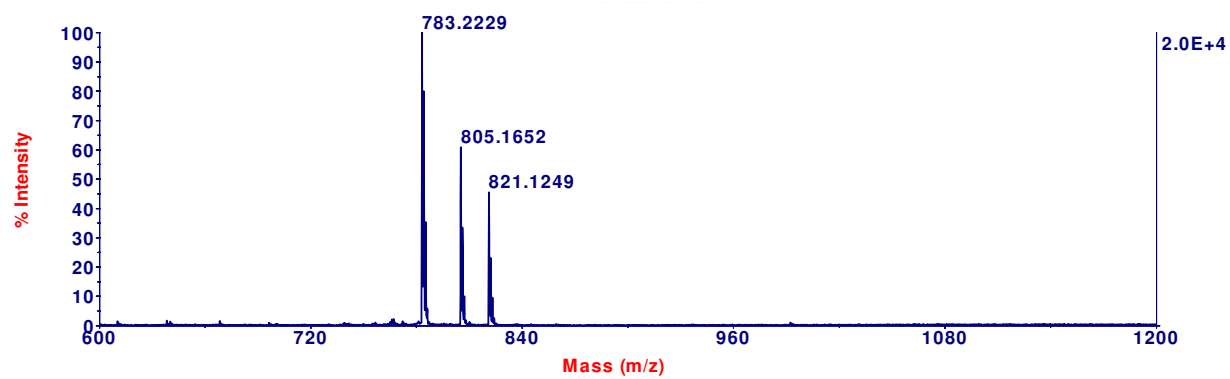

Figure 4. RP HPLC trace (up) and MALDI-TOF spectrum (down) of analog 4.

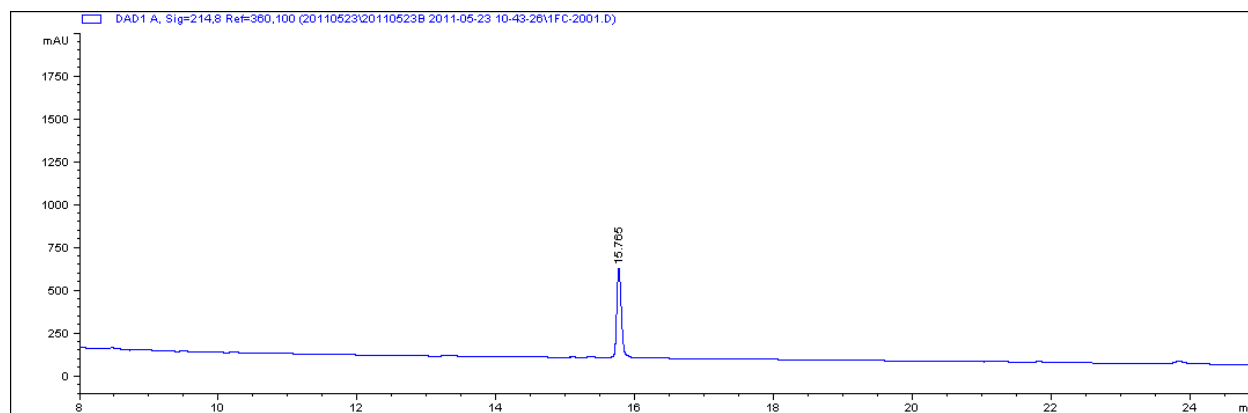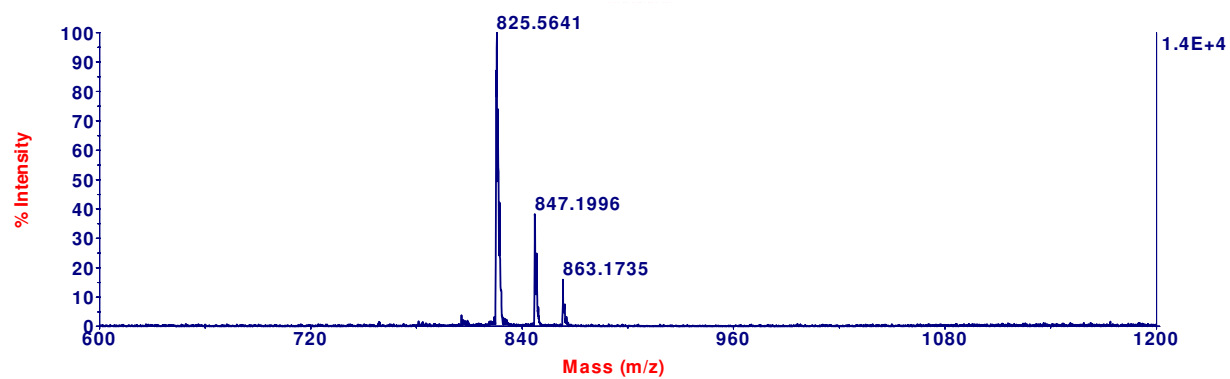

Figure 5. RP HPLC trace (up) and MALDI-TOF spectrum (down) of analog 5.

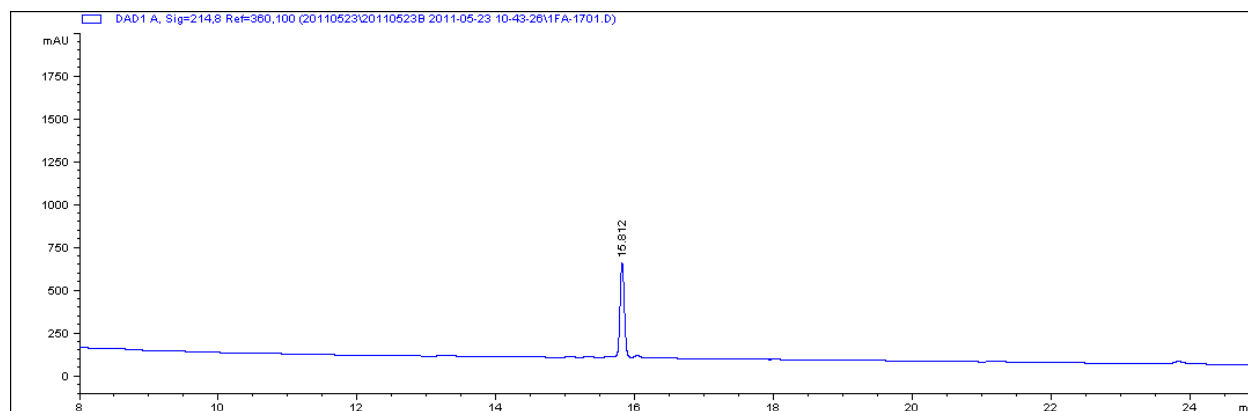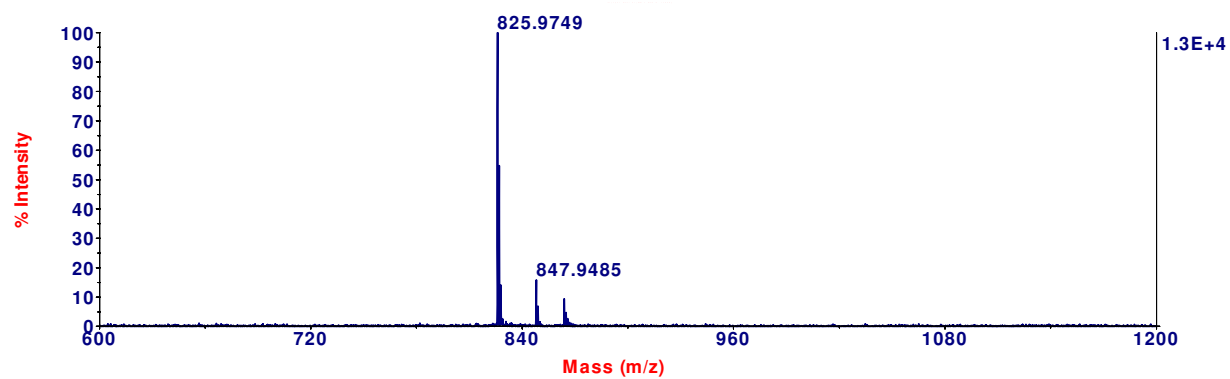

Figure 6. RP HPLC trace (up) and MALDI-TOF spectrum (down) of analog 6.

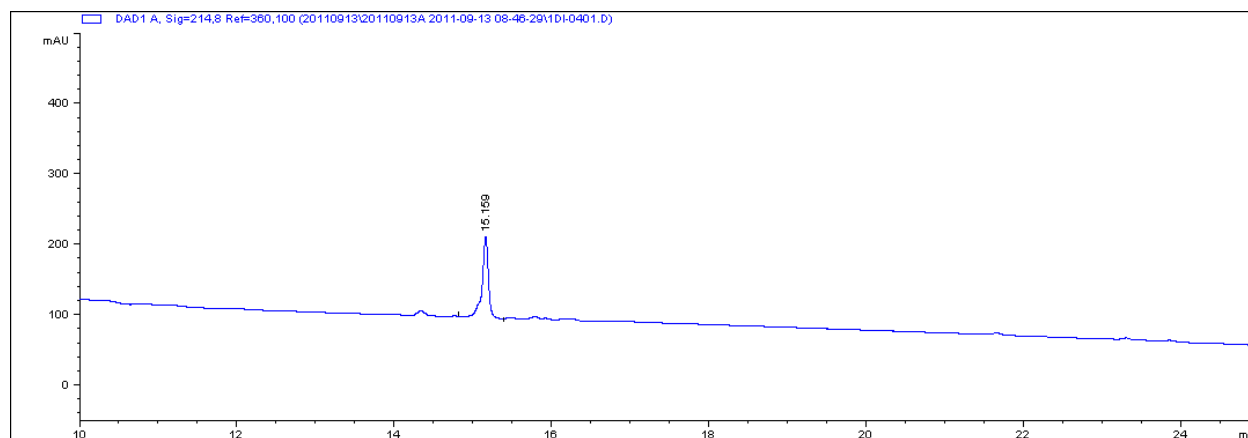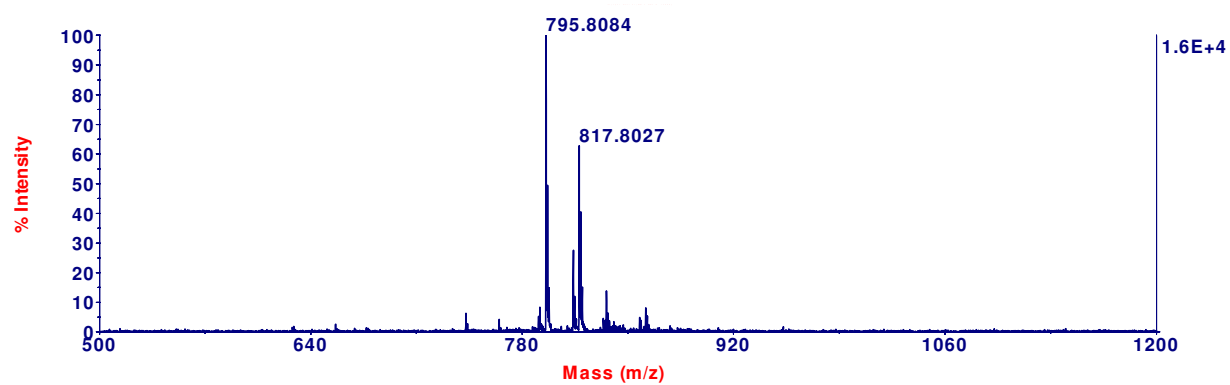

Figure 7. RP HPLC trace (up) and MALDI-TOF spectrum (down) of analog 7.



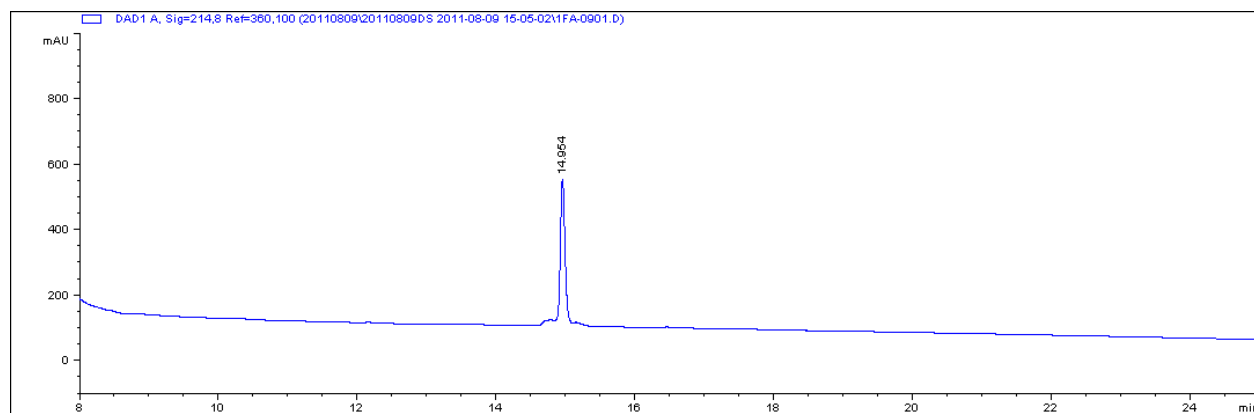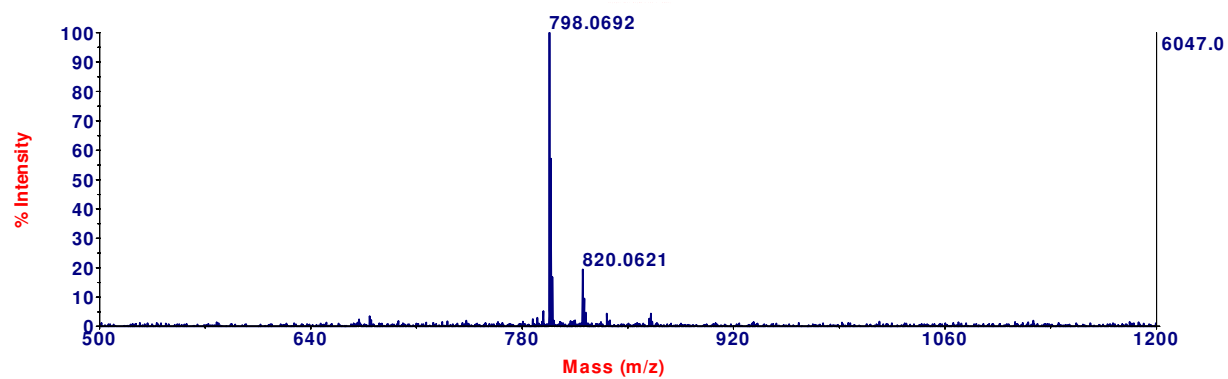

Figure 8. RP HPLC trace (up) and MALDI-TOF spectrum (down) of analog **8**.

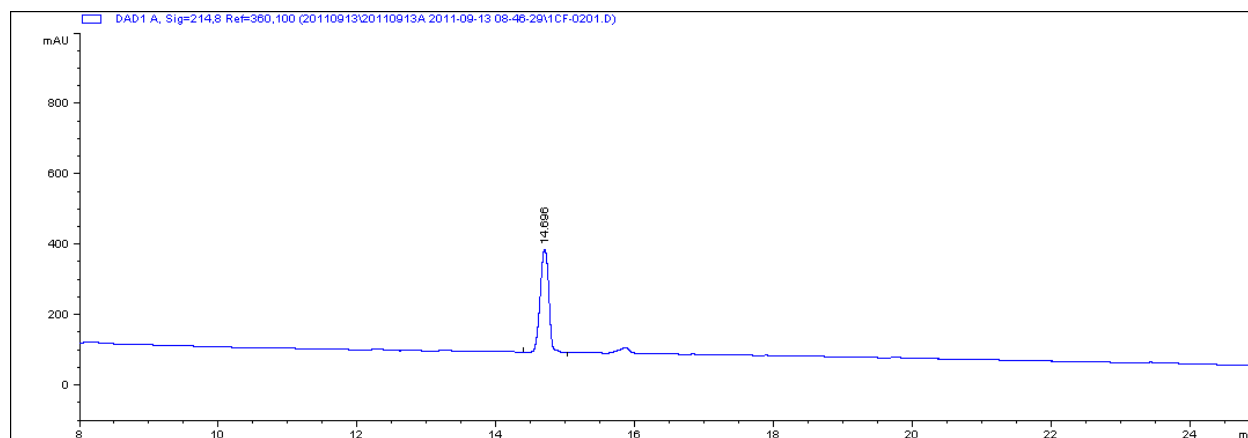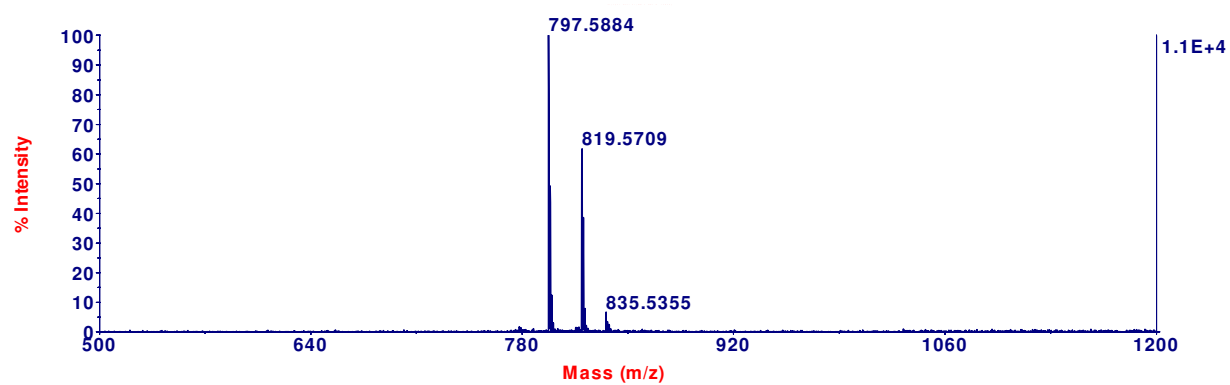

Figure 9. RP HPLC trace (up) and MALDI-TOF spectrum (down) of analog **9**.

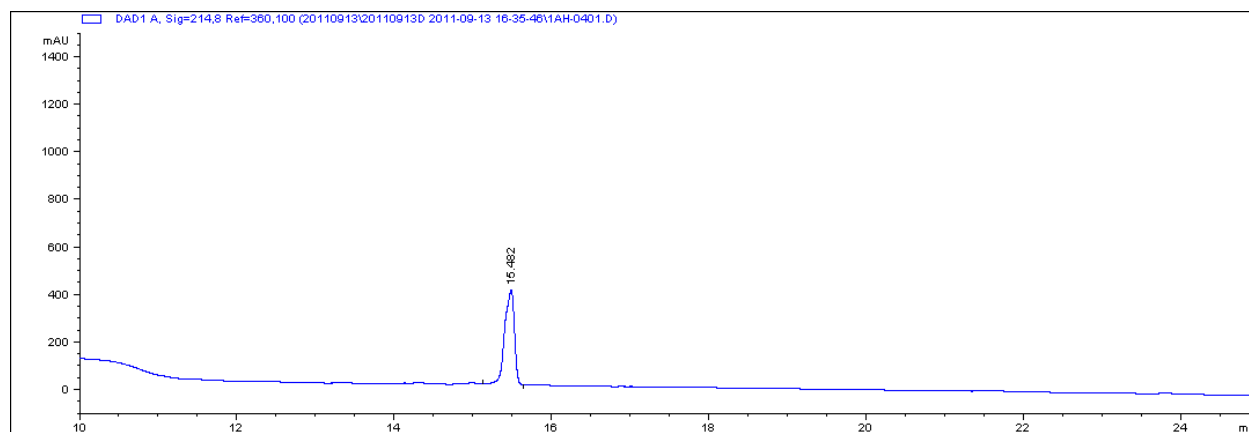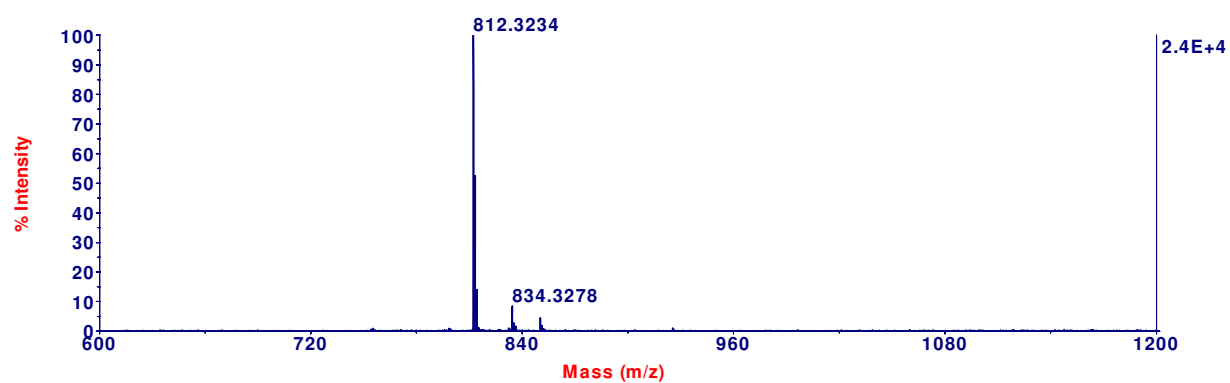

Figure 10. RP HPLC trace (up) and MALDI-TOF spectrum (down) of analog 10.

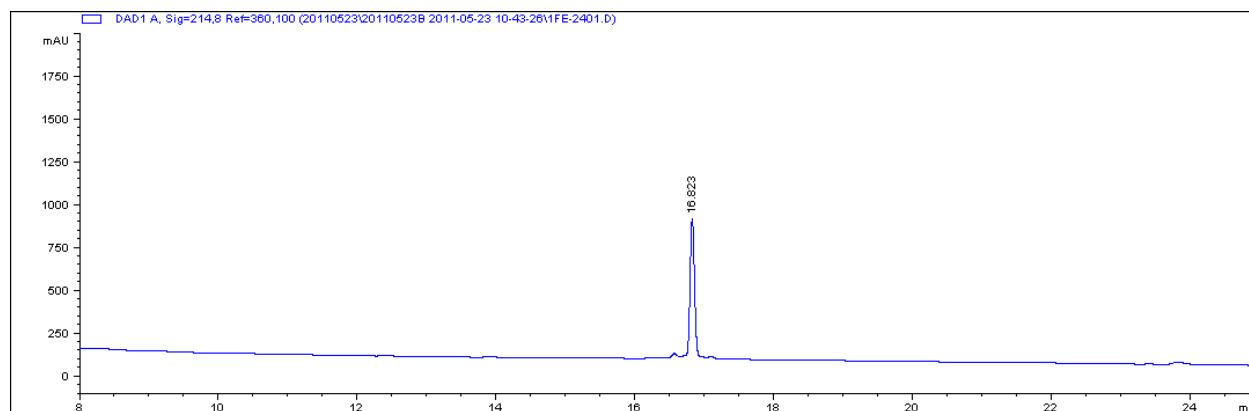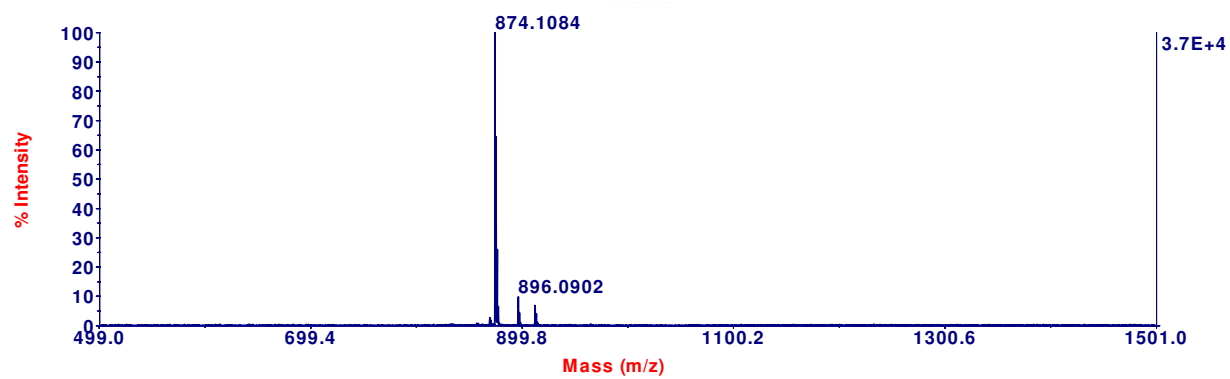

Figure 11. RP HPLC trace (up) and MALDI-TOF spectrum (down) of analog 11.

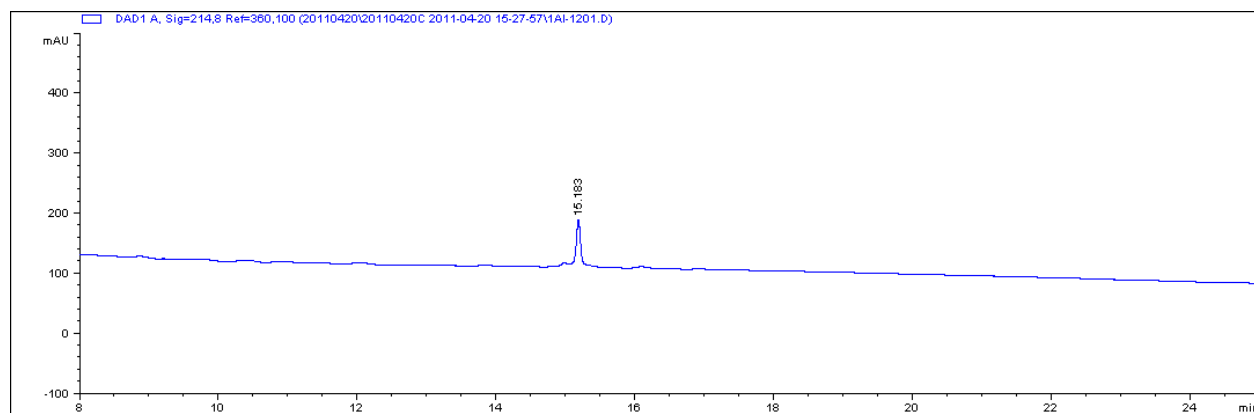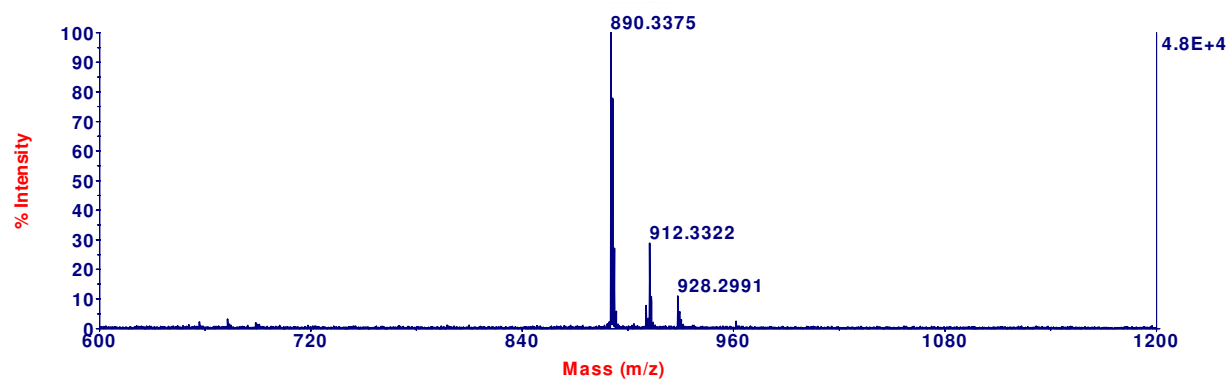

Figure 12. RP HPLC trace (up) and MALDI-TOF spectrum (down) of analog **12**.

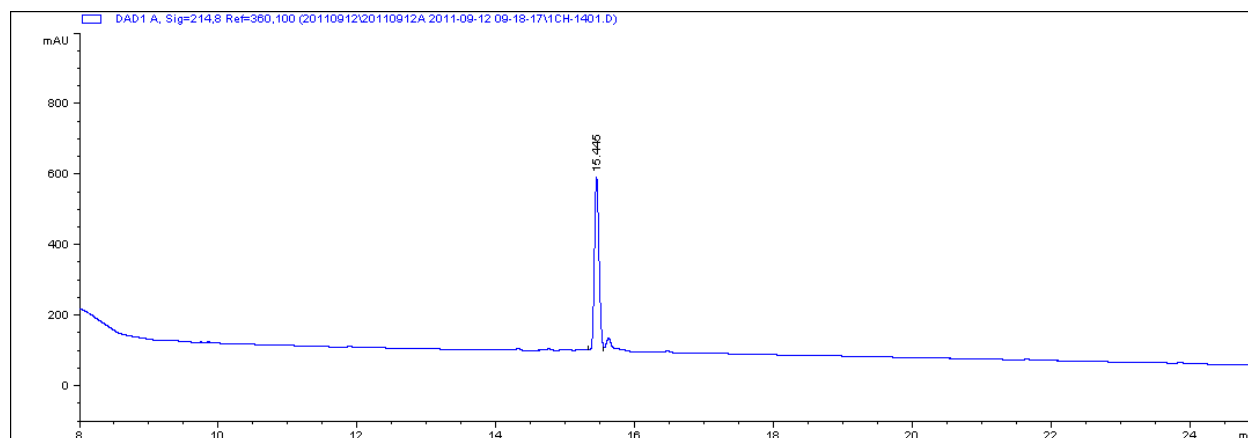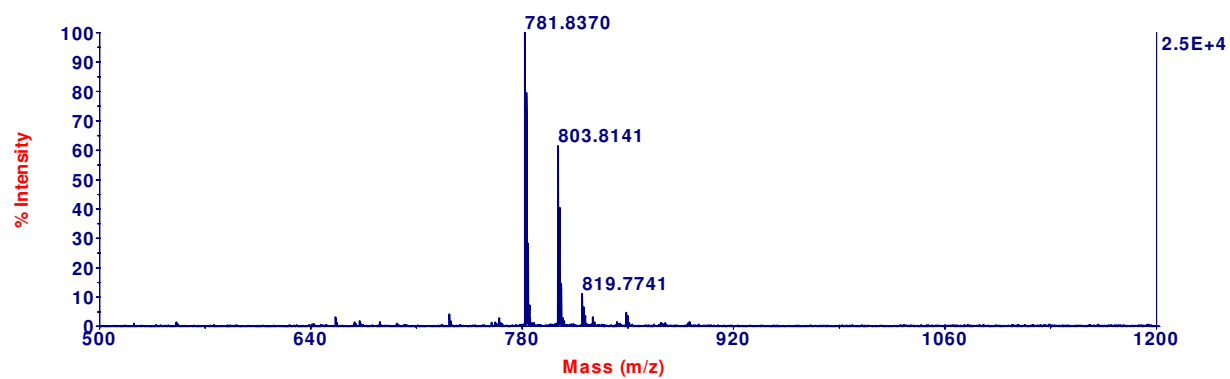

Figure 13. RP HPLC trace (up) and MALDI-TOF spectrum (down) of analog 13.

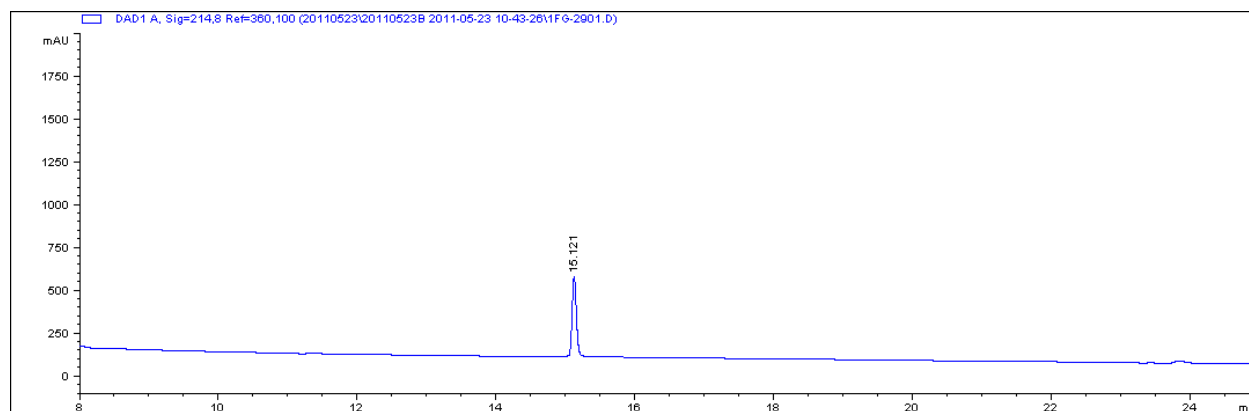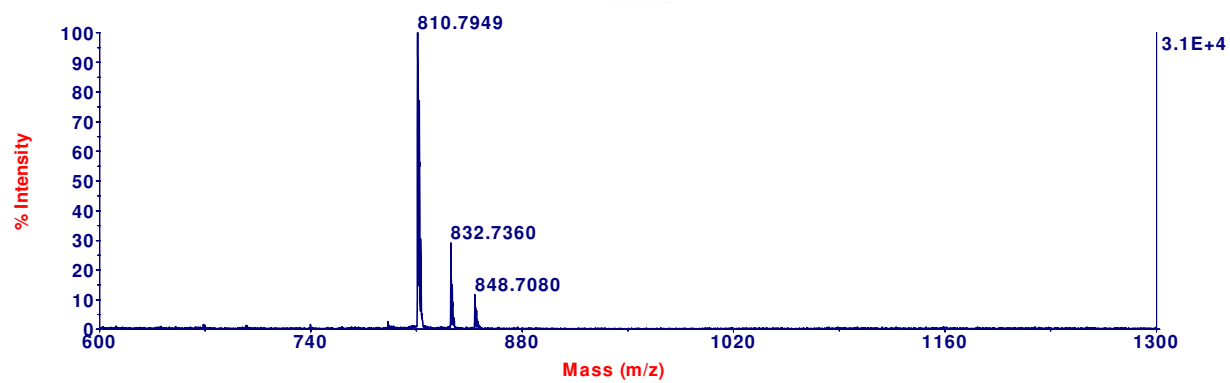

Figure 14. RP HPLC trace (up) and MALDI-TOF spectrum (down) of analog 14.

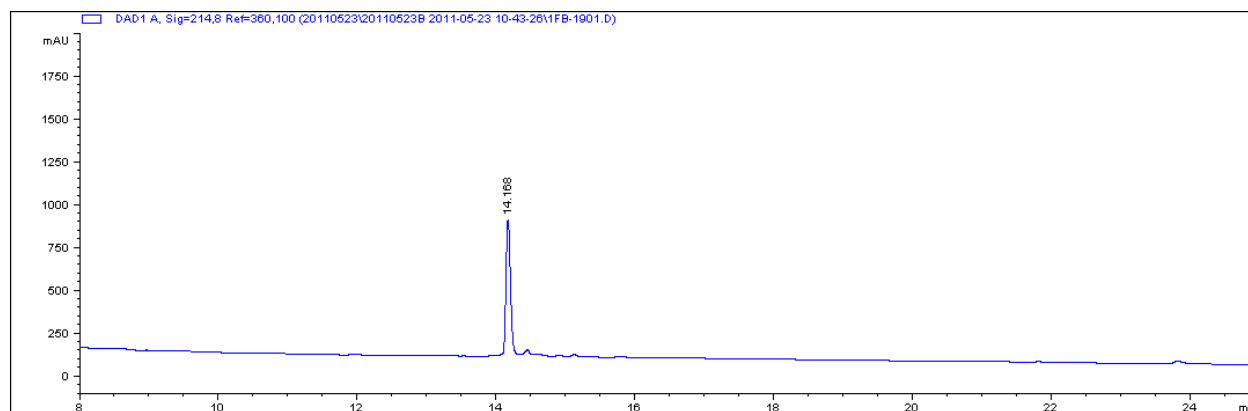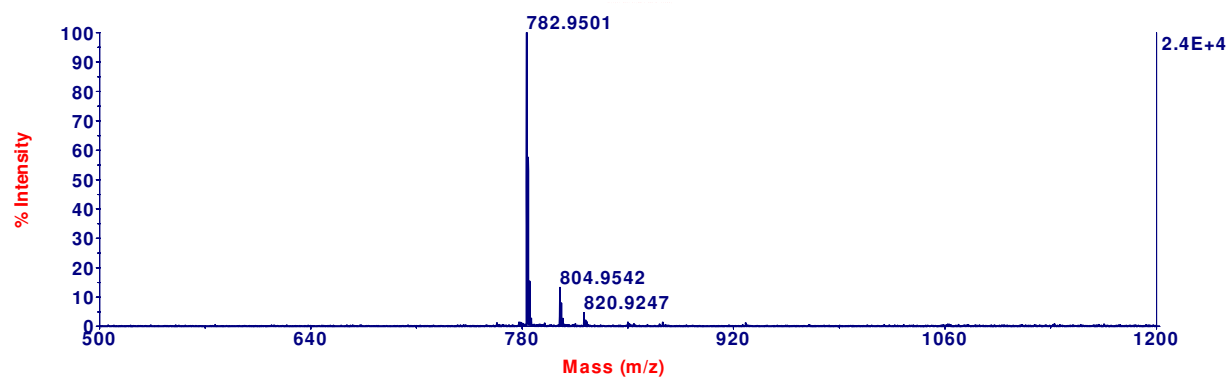

Figure 15. RP HPLC trace (up) and MALDI-TOF spectrum (down) of analog 15.



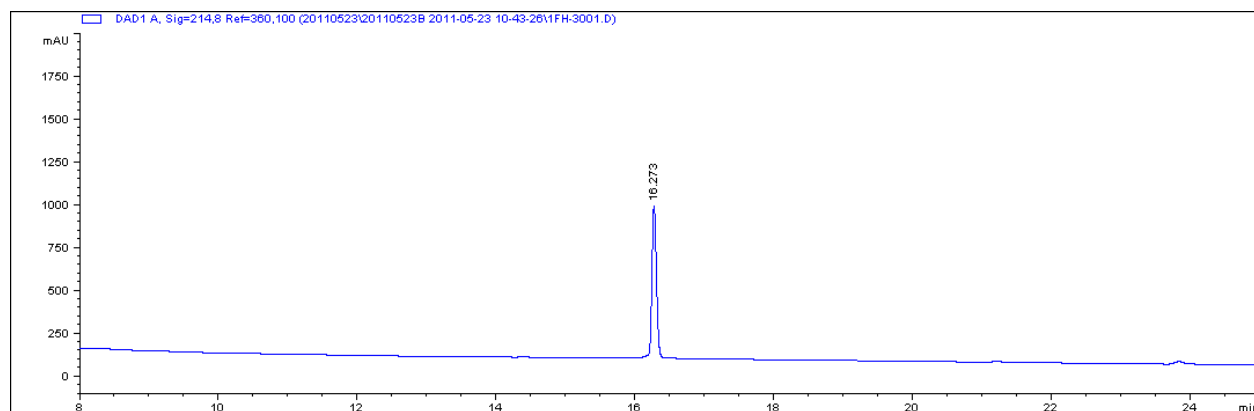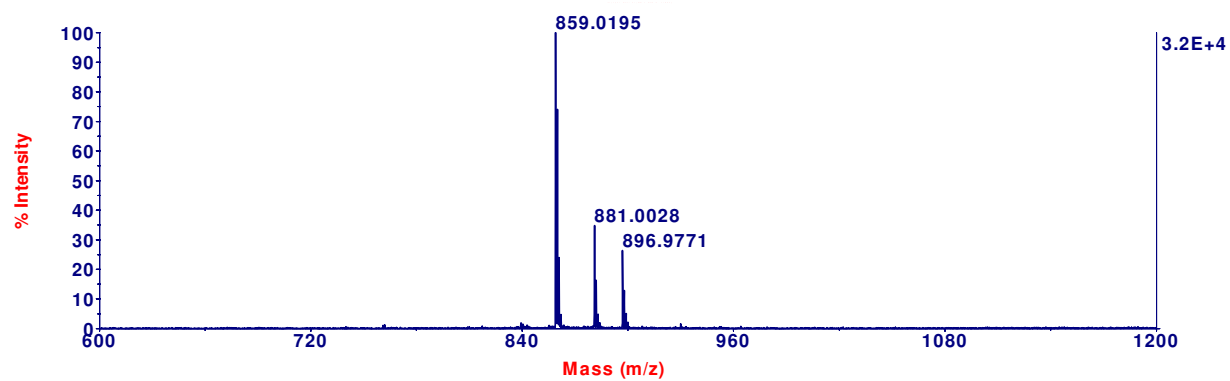

Figure 16. RP HPLC trace (up) and MALDI-TOF spectrum (down) of analog **16**.

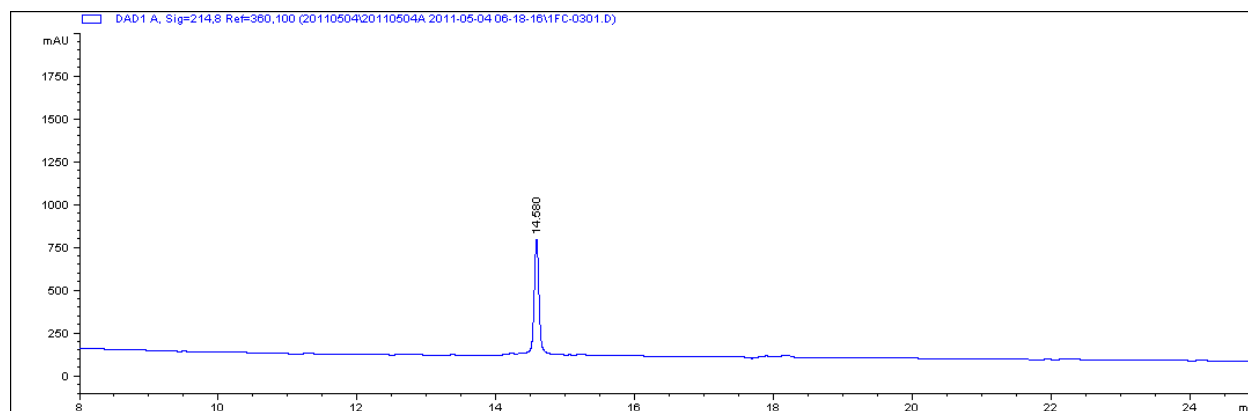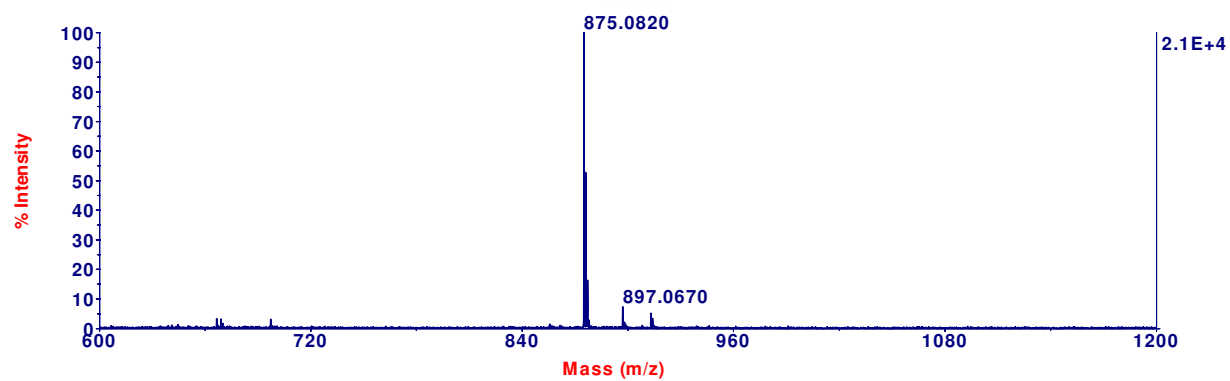

Figure 17. RP HPLC trace (up) and MALDI-TOF spectrum (down) of analog 17.

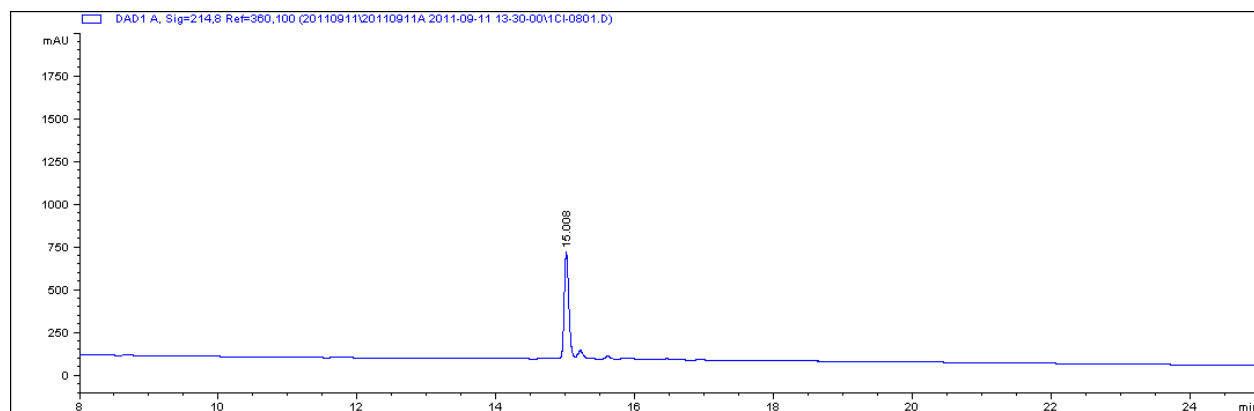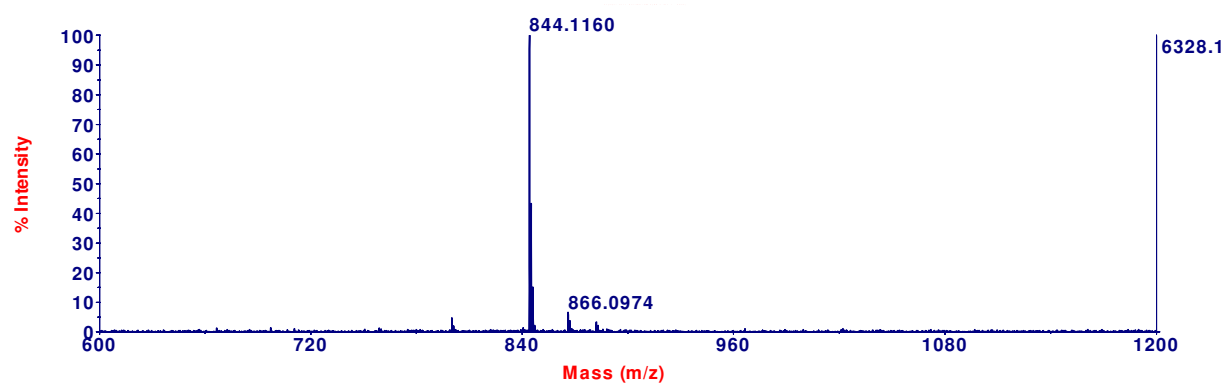

Figure 18. RP HPLC trace (up) and MALDI-TOF spectrum (down) of control lipopeptide **18**.

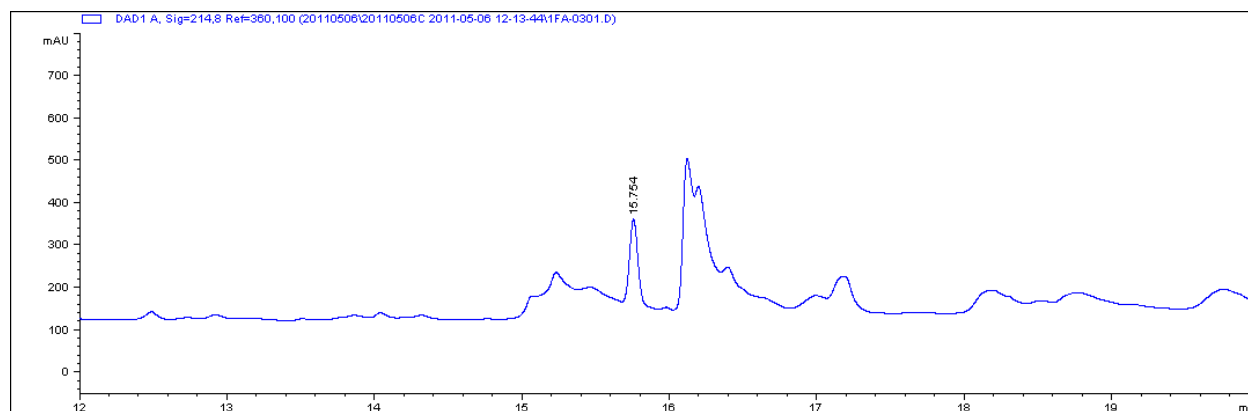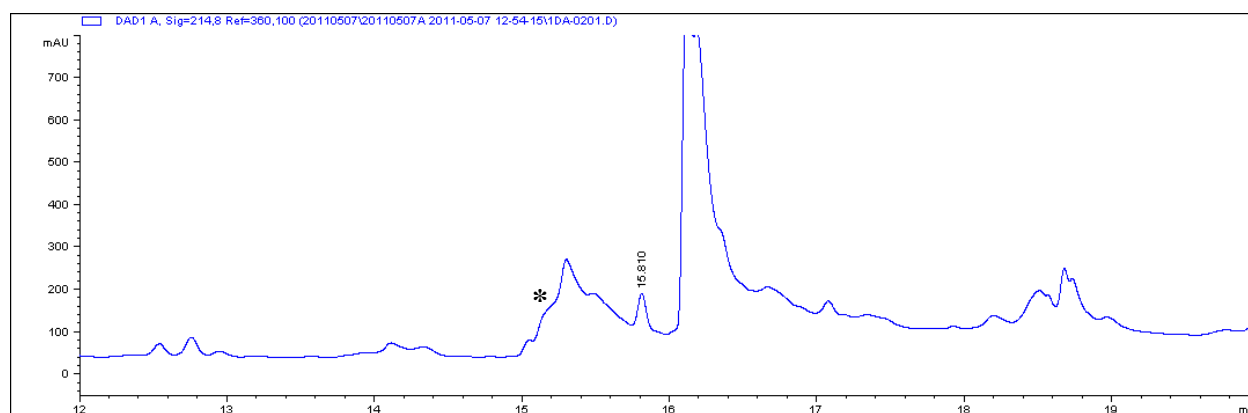

Figure 19. RP HPLC trace of analog **6** in 50% human serum at time 0 (up) and after 24 h incubation at 37°C (down). Peak at  $R_t=15.8$  corresponds to unchanged **6**. (\*) Marks approximate elution time ( $R_t= 15-15.2$  min.) of the major degradation product.

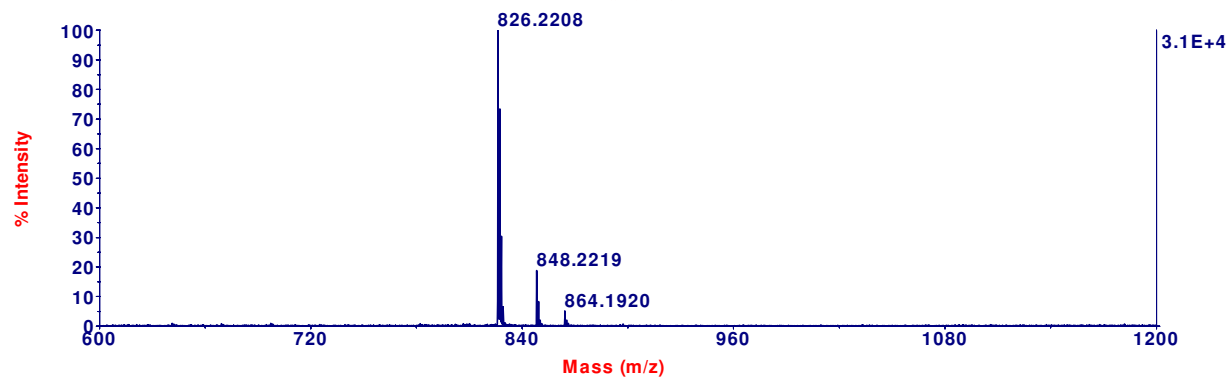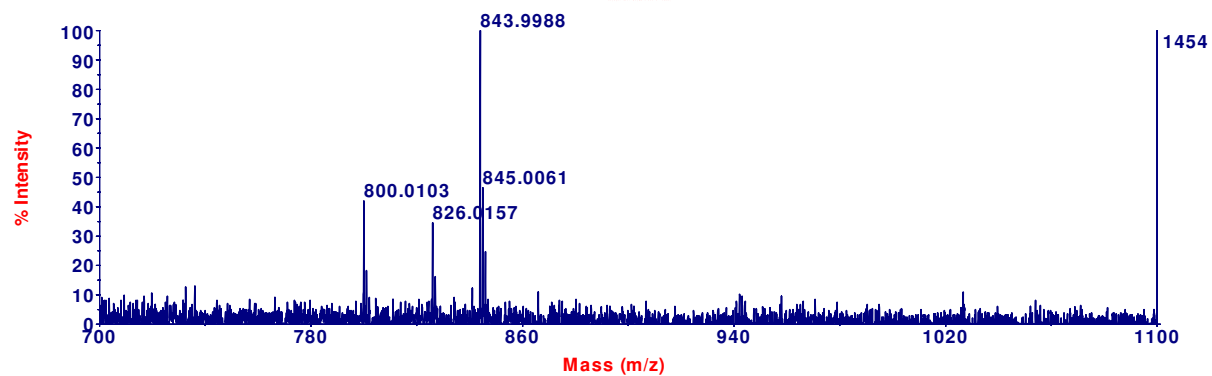

Figure 20. MALDI-TOF MS analysis of RP HPLC fractions obtained after 24h incubation of **6** in 50% human serum. Up: fraction collected at  $R_t=15.7$  min., corresponding to unchanged **6**, down: fraction collected at  $R_t=15-15.2$  min., indicating ester bond hydrolysis in **6** to generate the major degradation product (m/z and RP HPLC  $R_t$  are almost identical, within experimental error, to control linear lipopeptide **18**).

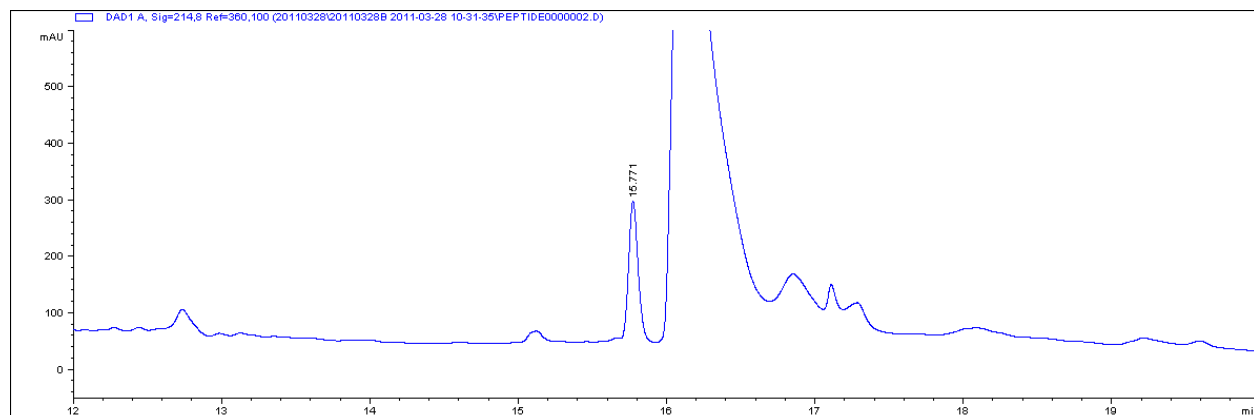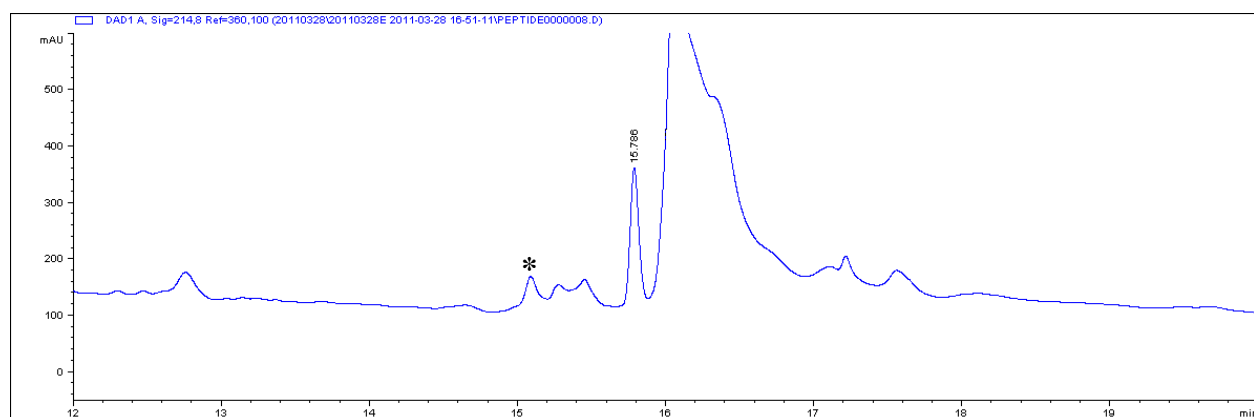

Figure 21. RP HPLC trace of analog **6** in EMEM medium at time 0 (up) and after 24 h incubation at 37°C (down). Peak at  $R_t=15.7$  corresponds to unchanged **6**. (\*) Marks elution time ( $R_t=15.1$  min.) of the major degradation product.

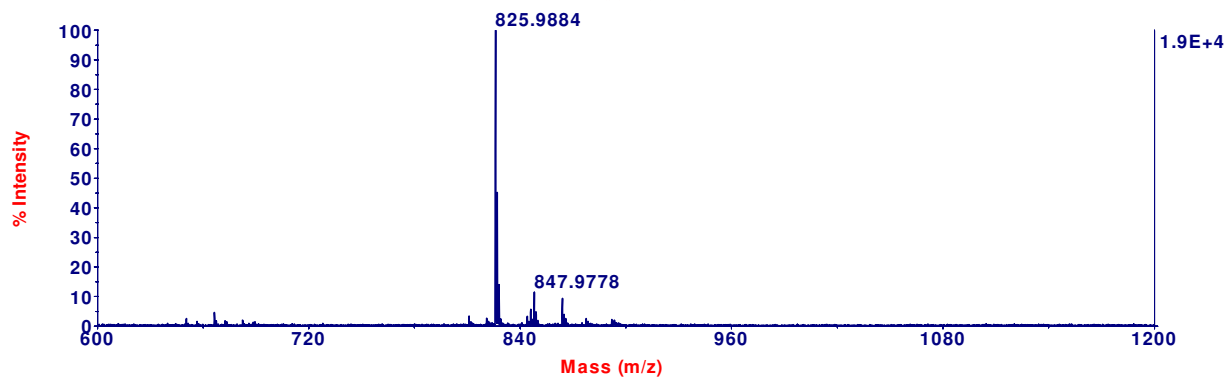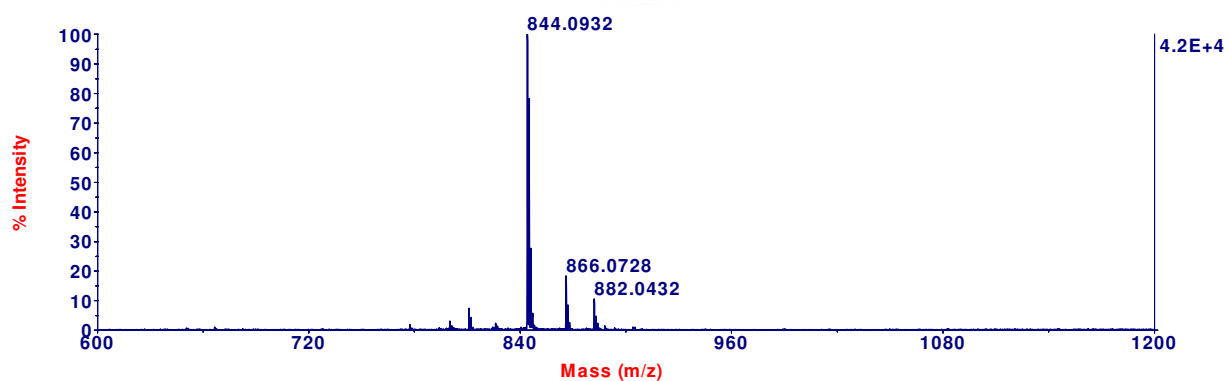

Figure 22. MALDI-TOF MS analysis of RP HPLC fractions obtained after 24h incubation of **6** in EMEM medium. Up: fraction at 15.7 min, down: fraction at 15.1 min.

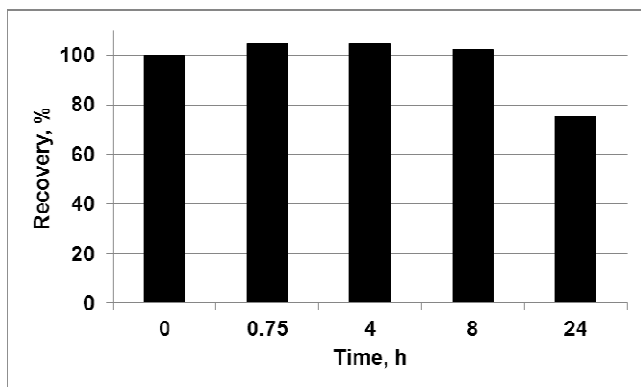

Figure 23. Serum stability of fusaricidin analog **6** in EMEM medium containing 10% FBS.

Table 1. Hemolytic activity of selected fusaricidin A /LI-F04a analogs<sup>a</sup>.

| Peptide concentration (µg/mL) | Analog          |    |    |       |      |      |      |     |      |     |
|-------------------------------|-----------------|----|----|-------|------|------|------|-----|------|-----|
|                               | 2               | 4  | 5  | 6     | 8    | 11   | 14   | 15  | 16   | 18  |
| <b>256</b>                    | - <sup>b</sup>  | -  | -  | 109.2 | -    | 96.8 | 14.9 | -   | 52.5 | -   |
| <b>128</b>                    | -               | -  | -  | 88.7  | -    | 95.2 | 6.3  | -   | 25.3 | -   |
| <b>64</b>                     | nd <sup>c</sup> | nd | nd | 43.5  | 29.2 | 63.6 | 3.9  | 1.1 | 1.6  | 8.1 |
| <b>32</b>                     | nd              | nd | nd | 1.4   | 1.2  | 27.1 | nd   | nd  | nd   | 8.3 |
| <b>16</b>                     | nd              | nd | nd | nd    | nd   | nd   | nd   | nd  | nd   | nd  |
| <b>8</b>                      | nd              | nd | nd | nd    | nd   | nd   | nd   | nd  | nd   | nd  |

<sup>a</sup> Expressed as % of hemolysis caused by Triton X-100; <sup>b</sup> not tested; <sup>c</sup> nd=no hemolysis detected.
